# Supplementary material for: Emotion Coregulation in Mother-Child Dyads: A Dynamic Systems Analysis of Children with and without Autism Spectrum Disorder
Source: Springer Nature journal article supplement (doi:10.1007/s10802-016-0234-9), 2017-01-04
Supplement: MOESM1 [file 11979292]

Online Supplementary Table 1

*Summary of Child Engagement Coding in State Space Grid*

| Child Engagement | Global  Characteristics | Facial Expression | Vocalization | Attention | Body Posture/  Behavior |
| --- | --- | --- | --- | --- | --- |
| Object | Positive engagement  with toy(s) | Neutral to positive expression | Self-talk | Full attention on toy(s) | No specific  criteria |
| High positive | Joyful and  affectionate  interaction | Animated and surprised look, full-blown smile | Laughing  squealing | Sustains  eye contact with mother/task | Displays genuine  affection towards mother (hugging,  kissing) |
| Medium  positive | Full social  interaction | Interest, hint of smile | Clear,  content tone | Full  eye contact with mother/task | Faces or leans towards mother, close proximity with mother |
| Low positive | Intermittent  social interaction | Neutral | Not clear, mumble | Fleeting  eye contact with mother/task | Keeps distance from mother |
| High negative | Aggressively  protesting | Crying face | Crying | Attention on mother/task | Hits, kicks,  throws object(s) |
| Medium negative | Actively  protesting | Frowning,  grimacing | Fussing,  whining | Attention on mother/task | Pushes, rejects interaction with mother/task |
| Low negative | Frustration | Lips compressed,  lips tightened | Whimpering,  complaining | Attention on mother/task | Subtle resistance |
| High  disengagement | Complete  withdrawal | Flat affect,  very fearful,  sad | No specific  criteria | No attention on mother/task | Walks/runs away from mother/task |
| Medium disengagement | Partial withdrawal | Moderately  fearful, sad | No specific  criteria | Minimally engages with mother/task | Pulls away,  turns away from mother/task |
| Low  disengagement | Brief  distraction | Mildly fearful, sad | No specific  criteria | Looks away,  gazes aversion | Slumped  posture,  listless demeanor |
